# Supplementary material for: Biological and Clinical Significance of the CCR5/CCL5 Axis in Hepatocellular Carcinoma
Source: MDPI journal article supplement (doi:10.3390/cancers12040883), 2020-04-05
Supplement: s1 [file s1]

Article

# Biological and Clinical Significance of the CCR5/CCL5 Axis in Hepatocellular Carcinoma

Santosh K. Singh, Manoj K. Mishra, Brian M. Rivers, Jennifer B. Gordetsky, Sejong Bae and Rajesh Singh

Supplementary Materials 1.

(A)

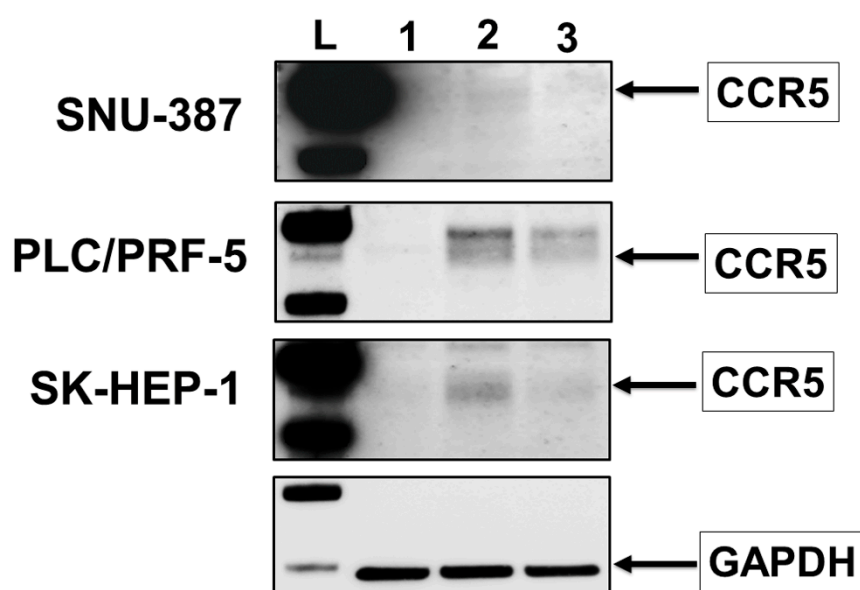

**Lane L:** Protein Ladder  
**Lane 1:** Untreated  
**Lane 2:** CCL5 treatment  
**Lane 3:** CCL5+Maraviroc treatment

(B) Densitometry readings/intensity ratio.

|                | CCR5/GAPDH |           |          |
|----------------|------------|-----------|----------|
|                | SNU387     | PLC/PRF-5 | SK-HEP-1 |
| UT             | 1.269129   | 0.045158  | 0.250225 |
| CCL5           | 1.43037    | 2.861028  | 2.56223  |
| CCL5+maraviroc | 1.112502   | 0.9526    | 0.793331 |

**Figure S1.** Western blots supplementary figures showing the expression of CCR5 makers in liver cancer cells. (A) HCC cells were treated with CCL5 with or without inhibitor (maraviroc) for 30 min and the expression of protein CCR5 (size 40kd) was analyzed by immunoblots. The house keeping marker GAPDH (37kd) was used as a loading control. For SNU-387, PLC/PRF-5 and SK-HEP-1 cells: Lane 1, 2, and 3 represent untreated, CCL5 treated and CCL5 with maraviroc treatment. L: represents the protein ladder. Images were cropped in the respective figures. (B) Densitometric readings/intensity ratio of Western blots for CCR5 in HCC cells. The house-keeping marker (GAPDH)

was used as a loading control. The ratios for immunoblot densitometry shown are representative of three independent experiments.

(A)

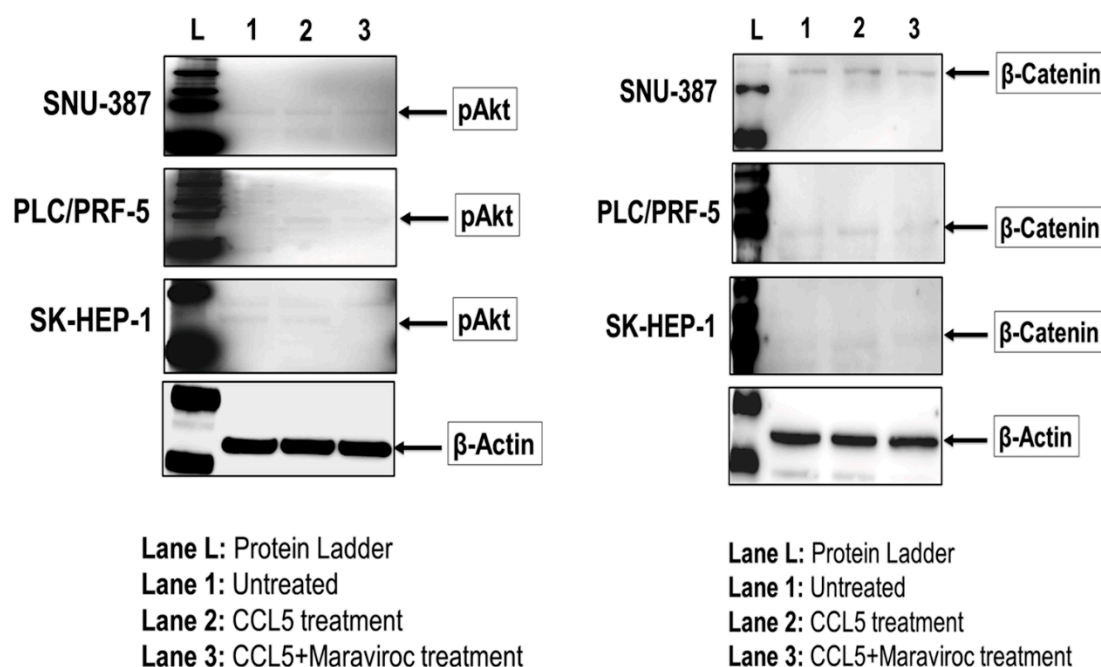

(B) Densitometry readings/intensity ratios.

| p-Akt/ $\beta$ -Actin |          |           |          |
|-----------------------|----------|-----------|----------|
|                       | SNU387   | PLC/PRF-5 | SK-HEP-1 |
| UT                    | 1.052182 | 0.1866    | 0.261754 |
| CCL5                  | 1.059205 | 2.126713  | 2.627383 |
| CCL5+maraviroc        | 1.009444 | 0.653153  | 0.090918 |

  

| $\beta$ -Catenin/ $\beta$ -Actin |          |           |          |
|----------------------------------|----------|-----------|----------|
|                                  | SNU387   | PLC/PRF-5 | SK-HEP-1 |
| UT                               | 0.680491 | 0.225679  | 0.082592 |
| CCL5                             | 0.809048 | 1.189804  | 2.198163 |
| CCL5+maraviroc                   | 0.698827 | 0.887205  | 0.702361 |

**Figure S2.** Western blots supplementary figures showing the expression of p-Akt and  $\beta$ -catenin makers in liver cancer cells. (A) HCC cells were treated with CCL5 with or without inhibitor (maraviroc) for 30 min and the expression of protein pAkt (60 kd) and  $\beta$ -catenin (92 Kd) was analyzed by immunoblots. The house keeping marker  $\beta$ -actin (45 kD) was used as a loading control. For SNU-387, PLC/PRF-5 and SK-HEP-1 cells: Lane 1, 2, and 3 represent untreated, CCL5 treated and CCL5 with maraviroc treatment. L: represents the protein ladder. Images were cropped in the respective figures. (B) Densitometric readings/intensity ratio of Western blots for Akt and  $\beta$ -catenin in HCC cells. The house-keeping marker ( $\beta$ -actin) was used as a loading control. The ratios for immunoblot densitometry shown are representative of three independent experiments.

**Table S1.** Demographic information of human liver cancer tissue.

| No. | Sex    | Age | Key word                 | Tumor grades |
|-----|--------|-----|--------------------------|--------------|
| 1   | Female | 73  | Hepatocellular carcinoma | III          |
| 2   | Female | 73  | Non-neoplastic           |              |
| 3   | Female | 58  | Hepatocellular carcinoma | II           |
| 4   | Female | 58  | Non-neoplastic           |              |
| 5   | Male   | 81  | Hepatocellular carcinoma | II           |
| 6   | Male   | 81  | Non-neoplastic           |              |
| 7   | Male   | 72  | Hepatocellular carcinoma | II           |
| 8   | Male   | 72  | Non-neoplastic           |              |
| 9   | Male   | 80  | Hepatocellular carcinoma | III          |
| 10  | Male   | 80  | Non-neoplastic           |              |
| 11  | Male   | 10  | Hepatocellular carcinoma | II           |
| 12  | Male   | 10  | Non-neoplastic           |              |
| 13  | Male   | 88  | Hepatocellular carcinoma | II           |
| 14  | Male   | 88  | Non-neoplastic           |              |
| 15  | Male   | 76  | Hepatocellular carcinoma | III          |
| 16  | Male   | 77  | Non-neoplastic           |              |
| 17  | Male   | 59  | Hepatocellular carcinoma | I            |
| 18  | Male   | 59  | Non-neoplastic           |              |
| 19  | Male   | 63  | Hepatocellular carcinoma | III          |
| 20  | Male   | 63  | Non-neoplastic           |              |
| 21  | Male   | 57  | Hepatocellular carcinoma | II           |
| 22  | Male   | 57  | Non-neoplastic           |              |
| 23  | Male   | 61  | Hepatocellular carcinoma | I            |
| 24  | Male   | 61  | Non-neoplastic           |              |
| 25  | Male   | 65  | Hepatocellular carcinoma | II           |
| 26  | Male   | 65  | Non-neoplastic           |              |
| 27  | Male   | 59  | Hepatocellular carcinoma | III          |
| 28  | Male   | 59  | Non-neoplastic           |              |
| 29  | Female | 66  | Hepatocellular carcinoma | III          |
| 30  | Female | 66  | Non-neoplastic           |              |
| 31  | Female | 64  | Hepatocellular carcinoma | III          |
| 32  | Female | 64  | Non-neoplastic           |              |
| 33  | Male   | 80  | Hepatocellular carcinoma | III          |
| 34  | Male   | 80  | Non-neoplastic           |              |
| 35  | Male   | 44  | Hepatocellular carcinoma | III          |
| 36  | Male   | 44  | Non-neoplastic           |              |
| 37  | Male   | 56  | Hepatocellular carcinoma | II           |
| 38  | Male   | 56  | Non-neoplastic           |              |
| 39  | Male   | 41  | Hepatocellular carcinoma | III          |
| 40  | Male   | 41  | Non-neoplastic           |              |
| 41  | Male   | 55  | Hepatocellular carcinoma | II           |
| 42  | Male   | 55  | Non-neoplastic           |              |
| 43  | Female | 51  | Hepatocellular carcinoma | III          |
| 44  | Female | 51  | Non-neoplastic           |              |
| 45  | Male   | 63  | Hepatocellular carcinoma | II           |
| 46  | Male   | 63  | Non-neoplastic           |              |
| 47  | Male   | 67  | Hepatocellular carcinoma | II           |
| 48  | Male   | 67  | Non-neoplastic           |              |
| 49  | Male   | 73  | Hepatocellular carcinoma | I            |
| 50  | Male   | 73  | Non-neoplastic           |              |
| 51  | Male   | 68  | Hepatocellular carcinoma | I            |
| 52  | Male   | 68  | Non-neoplastic           |              |
| 53  | Male   | 66  | Hepatocellular carcinoma | III          |
| 54  | Male   | 66  | Non-neoplastic           |              |
| 55  | Female | 64  | Hepatocellular carcinoma | III          |
| 56  | Female | 64  | Non-neoplastic           |              |
| 57  | Male   | 56  | Hepatocellular carcinoma | III          |
| 58  | Male   | 56  | Non-neoplastic           |              |
| 59  | Female | 51  | Hepatocellular carcinoma | II           |
| 60  | Female | 51  | Non-neoplastic           |              |
| 61  | Male   | 42  | Hepatocellular carcinoma | III          |
| 62  | Male   | 42  | Non-neoplastic           |              |

|    |      |    |                          |     |
|----|------|----|--------------------------|-----|
| 63 | Male | 37 | Hepatocellular carcinoma | III |
| 64 | Male | 37 | Non-neoplastic           |     |

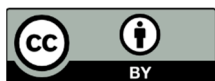

© 2020 by the authors. Licensee MDPI, Basel, Switzerland. This article is an open access article distributed under the terms and conditions of the Creative Commons Attribution (CC BY) license (<http://creativecommons.org/licenses/by/4.0/>).
